# Supplementary material
Source: Frontiers journal article supplement (https://www.frontiersin.org/articles/446918)
Supplement: Table_1.XLSX [file Table_1.XLSX]

## Sheet: Sheet1
Replies	Likes	Shares	Link	Communication Goals	Valence	Tweet	Name	Age	Sex	Race	Nationality	Twitter Profile	Occupation
88	369	2319	https://twitter.com/MariahCarey/status/1050173139790032896	0	2	coming tonight!	Mariah Carey
171	3106	925	https://twitter.com/MariahCarey/status/1050171603462615040	0	2	Watch the #WithYou💕 music video now on @etnow!	Mariah Carey
178	4154	1038	https://twitter.com/MariahCarey/status/1050099768691703809	0	2	More Watch the exclusive video premiere of WITH YOU tonight on @etnow at 7:30pm ET! #WithYou 💕	Mariah Carey
70	3626	1167	https://twitter.com/stephenfry/status/1049920488577871872	2	3	This #WorldMentalHealthDay2018 let’s shine a light on mental health across the world This #WorldMentalHealthDay2018 let’s shine a light on mental health across the world https://vimeo.com/294163792 #TimeToAct #TimeToAct	Stephen Fry
10	272	57	https://twitter.com/stephenfry/status/1049955196070191105	3	3	The Box is a valuable pocket book that suggests an interesting and potentially very useful approach to anxiety and loss. @theboxbook1 http://www.theboxbook.co.uk	Stephen Fry
674	37125	9572	https://twitter.com/halsey/status/1050147646390726657	1	1	Today is #WorldMentalHealthDay. I started my career in music when I was 18 years old and for its entirety thus far I have been very open about having Bipolar Disorder. I have spent much of my transitionary ife and early adulthood being ridiculed and mocked on a world stage by media outlets and individuals who don't understand Bipolar and encourage a negative stigma of the illness. However. I have…	Halsey
23	260	34	https://twitter.com/BrianWilsonLive/status/1050038909835587585	0	2	Brian's Back! Brian starts up his Fall tour October 27 in Bangor Maine! Check out dates and tickets for a show near you! http://brianwilson.com/tour	Brian Wilson
0	12	7	https://twitter.com/ellen_forney/status/1050149914150354945	3	3	Happy World Mental Health Day! :/ Here is a tool to help with out-of-control emotional storms - my favorite new trick in Rock Steady. It's also gotten raves from readers, including therapists (but I believe cats are not so fond of it). #smedmerts #worldmentalhealthday #dbtskills #mammaliananddivingreflex	Ellen Forney
0	8	4	https://twitter.com/ellen_forney/status/1050153487638511616	3	3	1/3 The Mammalian Diving Reflex, for you! on World Mental Health Day. It’s a full page in Rock Steady because it is AWESOME. #SMEDMERTS	Ellen Forney
0	5	2	https://twitter.com/ellen_forney/status/1050153712318992384	3	3	2/3 Mammalian Diving Reflex, as presented in Rock Steady #SMEDMERTS	Ellen Forney
0	5	2	https://twitter.com/ellen_forney/status/1050154064904744960	3	3	3/3 The magic of the Mammalian Diving Reflex, as presented in my book Rock Steady. #SMEDMERTS	Ellen Forney
1	309	80	https://twitter.com/heidiheilig/status/1050021952038027265	0	2	Me putting myself out there:	Heidi Heilig
3	91	6	https://twitter.com/heidiheilig/status/1050041117624991746	0	2	i hope everyone and everything is safe from the hurricane except for mar a largo, i hope that place floods, catches fire, is struck by lightning, and then is covered in a freak eruption of magma.	Heidi Heilig
0	23	1	https://twitter.com/heidiheilig/status/1050050011864686595	4	1	The Question: Writers, how DO you do XYZ? Writers in Public: Well, I ABC! Me in Private: I fail constantly!	Heidi Heilig
0	41	21	https://twitter.com/search?l=&q=from%3Aheidiheilig%20since%3A2018-10-09%20until%3A2018-10-11&src=typd&lang=en	1	3	Okay folks, it's #WorldMentalHealthDay, so for those who don't know, FOR A MUSE OF FIRE is a fantasy with a queer bipolar protagonist of color: a shadow puppeteer seeking a cure for her 'malheur' in a war-torn land. I love her and I hope you will too.	Heidi Heilig
0	84	11	https://twitter.com/heidiheilig/status/1050024243872845824	0	2	Can't wait for Millennials to end the Republican Party.	Heidi Heilig
0	20	0	https://twitter.com/heidiheilig/status/1050014926989914113	1	1	Yeah so today is #worldmentalheathday but uh honestly i feel like i talk about mental health almost every day so you know all that stuff i have said forever i mean it extra hard today i guess.	Heidi Heilig
0	8	0	https://twitter.com/heidiheilig/status/1049982828224614400	0	2	One of the reasons I love the editorial process is that my background is in writing for musical theater. The theater kids out there already know that theater takes a huge amount of	Heidi Heilig
1	7	7	https://twitter.com/heidiheilig/status/1050044606337994753	0	2	Hey BIPOC folks into books, please consider applying here for this informational/networking session at HarperCollins!	Heidi Heilig
0	10	3	https://twitter.com/heidiheilig/status/1050053090395734017	0	2	Look i love my people but half is nothing to brag about. Aunties unite against the right! In this one instance red is NOT a lucky color!	Heidi Heilig
1	742	173	https://twitter.com/marylambertsing/status/1050023736643063808	0	2	HI YES GOOD MORNING JUST A REMINDER THAT OUR FEMINISM IS OPPRESSIVE IF IT’S NOT INTERSECTIONAL.	Mary Lambert
1	38	1	https://twitter.com/MauriceBenard/status/1050052608327593984	3	3	Yeah I can. Thank U.	Maurice Benard
28	454	33	https://twitter.com/TylerBaltierra/status/1050052557861806080	3	3	My cousin speaking FACTS!!!	Tyler Baltierra
123	4161	520	https://twitter.com/chrisbrown/status/1050129719889448960	0	2	http://blackpyramidclothing.com	Chris Brown
0	9	2	https://twitter.com/_tiffanybrown/status/1050168575519088640	0	2	I’m so happy to see Cardi B succeeding like this I’ve been fucking with her from when she used to do videos before she got her teeth done i love her	Tiffany Lee Brown
0	10	6	https://twitter.com/_tiffanybrown/status/1049944018346536960	0	2	We already know that but it taste so good	Tiffany Lee Brown
44	876	38	https://twitter.com/frankbrunoboxer/status/1050136273111924745	0	2	I miss this man	Frank Bruno
59	1295	31	https://twitter.com/frankbrunoboxer/status/1050089867118608385	0	2	So proud to announce my 2nd Granddaughter Olivia Frances Demus arrived safely in the world this morning 💗 I couldn’t be prouder of my daughter. Congratulations Nicola and Tad. Welcome to parenthood 💕	Frank Bruno
7	134	39	https://twitter.com/frankbrunoboxer/status/1049978095116140544	4	1	Very worrying, there’s not enough support for people who do ask for help & interventions are happening to late..if 46% suffer in silence this shows the problems are on a bunch bigger scale.More must be done for those that speak out to give confidence to those that don’t. #WMHD18	Frank Bruno
10	87	40	https://twitter.com/frankbrunoboxer/status/1049959352847802369	4	1	It’s very sad to see that on a poll on @FrankBrunoFound that nearly half are saying they would suffer in silence. To be able help to change this we need to know what stops someone from talking & seeking help? #WorldMentalHealthDay #EveryDayIsAMentalHealthDay	Frank Bruno
6	51	8	https://twitter.com/frankbrunoboxer/status/1049989331551698944	4	1	Great day thanks for making me so welcome these pictures of me "animated" talking about not wishing to be forced to take "zombie" drugs for the rest of my life	Frank Bruno
2	9	0	https://twitter.com/neilcole/status/1050064228135133185	0	2	Not saying I watch too much horror/detective drama… but I just bought cable-ties, duct tape and a lump hammer from my local hardware store and I’m convinced I’m now on some kind of serial killer watch-list	Neil Cole
1	0	0	https://twitter.com/neilcole/status/1049937798747295745	0	2	Predictably, something brilliant like @WSeriesRacing launches today and immediately hits the MANSPLAIN CHICANE…	Neil Cole
0	8	6	https://twitter.com/coppolawine/status/1050084628705370113	3	3	Hey L.A. folks, Hope to see you tomorrow at this special event!	Francis Ford Coppola
17	192	8	https://twitter.com/1pcornwell/status/1049974948121518080	0	2	Writing	Patricia Cornwell
38	5503	1655	https://twitter.com/TomFletcher/status/1050044250463883264	2	3	We all have weird little minds that work in ways we’ll never quite understand. As long as we understand that and talk about it the world will be a better place. You’re not alone. Talk. Cry. Share. Someone’s always ready to listen #WorldMentalHealthDay	Tom Fletcher
3	17	1	https://twitter.com/1ConnieFrancis/status/1050030282122903556	0	2	Thank you Ron Roberts for reminding me of this interview. Not sure why I didn't post a link sooner. My thanks to everyone who has viewed it and sent kind words. They are so very much appreciated. Love, Connie xx	Connie Francis
9	38	22	https://twitter.com/mattgood/status/1049737420642516992	4	1	800,000 people kill themselves every year. What can we do?	Matthew Good
2	8	4	https://twitter.com/mattgood/status/1050157726364356608	0	2	Jamal Khashoggi: details of alleged Saudi hit squad emerge	Matthew Good
277	42975	5728	https://twitter.com/DavidKHarbour/status/1050132931870638082	3	3	Today is World Mental Health day and a day to remind you that I have struggled and lived with bipolar 2 for 17 years. Abandon shame, embrace yourself and your diagnosis. You can have a rich, successful life and a vital cultural voice. We need you. Happy responsible medicating❤️	David Harbour
0	2	1	https://twitter.com/bennjordan/status/1050099867954159626	0	2	What kind of a jackass would remake Pet Sematary and not retain the old man character's thick, creepy rural Maine accent.	Benn Jordan
0	0	0	https://twitter.com/gorjoyce/status/1050020267324362752	0	2	Encountering unusual circumstances rouses potent emotions toda... More for Pisces http://bit.ly/xHSyh0	Sarah Joyce
14	74	4	https://twitter.com/KerryKatona7/status/1050107569887485953	0	2	Got me my vitaminb12surrey injection all set for a clear mind	Kerry Katona
1	26	8	https://twitter.com/PJK4brainhealth/status/1050038331680202753	3	3	More than 1 in 6 adults in Nebraska have a mental illness. The @kimfoundation offers hope and help to so many through advocacy and support services. Join me at their annual Hope & Healing Luncheon on 10/16 in La Vista.	Patrick J. Kennedy
710	65653	14147	https://twitter.com/wizkhalifa/status/1050118913919410176	0	2	IF YOU STILL HAVENT BOUGHT A PAIR OF THOSE BIG ASS BALENCIAGA SHOES IN THIS CLIMATE I APPLAUD YOU.	Wiz Khalifa
1	23	3	https://twitter.com/motomaratai/status/1050103607050326016	0	2	Me: "Our teenage daughter pronounces SciPy 'sippy.'" Joe: "I don't care! I have a teenage daughter who knows what SciPy is!" =)	Yoon Ha Lee
1	11	0	https://twitter.com/motomaratai/status/1050103607050326016	0	2	P.S. She knows how it's pronounced. She just does that to annoy us. (She was using it for FFT or something, I dunno.)	Yoon Ha Lee
4	6	3	https://twitter.com/lizlet/status/1050145642553651201	0	2	what if christopher nolan directed guardians of the galaxy 3	Liz Miller
92	1087	670	https://twitter.com/CraigMurrayOrg/status/1050030705709858816	0	2	Here in Scotland the public water supply is public owned, so we should be absolutely minging, if this complete bullshit from a right wing Labour MP contained any sense whatsoever.	Craig Murray
0	2	0	https://twitter.com/NovakTalks/status/1050012777774010368	0	2	AHHH a new challenge for campus safety- sharpen those policy pencils... -E-scooters are causing safety and accessibility headaches on campuses	Kim Novak
7	28	3	https://twitter.com/stevenpage/status/1050153534233153536	0	2	LIVE SHOWS THIS WEEK: @musicboxcle · Cleveland OH · Thurs 11th: http://www.musicboxcle.com/event/steven-page-trio-oct11/ … @thirty_one_west · Newark OH · Fri 12th: https://www.thirtyone-west.com/event/steven-page-trio/ … @SGHRevival · Newport KY · Sun 14th: https://www.ticketweb.com/event/steven-page-trio-formerly-of-the-southgate-house-revival-tickets/8484875 … See you there!	Steven Page
0	2	0	https://twitter.com/Gailporter/status/1049948595644973056	3	3	Love a Tombola. Have a great day. Xx	Gail Porter
20	442	7	https://twitter.com/AmberLPortwood/status/1050131635360940033	3	3	When you're bipolar and wake up manic lol nothing can stop you or so you think haha. Sending love to all my people dealing with any mental health struggles! #manicdays	Amber Portwood
4	3	0	https://twitter.com/AmberLPortwood/status/1050136597604253699	2	1	Absolutely. The feelings are night and day. Anyone who really has bipolar knows how the day will go the moment they wake up. Some are more manic then others but for me I have depressive spells that last for months sometimes but only become manic a couple days to a week at times.	Amber Portwood
1	2	0	https://twitter.com/AmberLPortwood/status/1050137328457531401	3	1	So we try to focus more on my depression spells and find that medium so I don't get stuck in it for too long. It's just certain meds etc that help you get to that normal range. My serotonin levels are very low so that's the main factor.	Amber Portwood
3	2	0	https://twitter.com/AmberLPortwood/status/1050138196934369280	2	1	Bipolar is different for everyone. The feeling or being aware is hard enough. But you can feel and see a difference. People who have my type of bipolar pray for manic days lol. Hope you keep getting good help.	Amber Portwood
55	446	22	https://twitter.com/mauroranallo/status/1050155763962802176	1	1	I am completely numb but I must continue to fight the good fight, if for no other reason than to continue to inspire my two nephews.Thanks for your concern. It is deeply appreciated.	Mauro Ranallo
570	4635	1085	https://twitter.com/mauroranallo/status/1049711026386624512	4	1	My best friend’s brother just committed suicide. I am done. I wanted my doc to help people but I feel like a fucking failure. WE NEED TO SMASH THE STIGMA OF MENTAL ILLNESS ONCE AND FOR ALL. TOO MANY PEOPLE ARE DYING!!! ENOUGH IS ENOUGH! FUCK!!!	Mauro Ranallo
87	2684	193	https://twitter.com/asliyoyo/status/1050053773710815234	0	2	Check out brand new song “Piche Picje” by one and only Alfaaz https://youtu.be/RmxtTK1zjvA Share it | Spread it	Yo Yo Honey Singh
0	1	0	https://twitter.com/CharleneSoraia/status/1050076057859235840	0	2	'Tragic Youth' has been added to the @applemusic Best of the Week playlist! #OMG #THANKYOU #TY #TRAGICYOUTH #BESTOFTHEWEEK ...click here to have a listen...	Charlene Soraia
514	14600	1688	https://twitter.com/britneyspears/status/1050142049855528960	0	2	The world changes when you put on your reading glasses lol	Britney Spears
3	105	10	https://twitter.com/search?f=tweets&q=from%3Aiammatthewsweet%20since%3A2018-10-09%20until%3A2018-10-11&src=typd	0	2	Very sad to hear that our dear friend John Wicks has passed away. I can still remember when I first heard Starry Eyes, The Records’ classic power pop anthem. So glad I got to meet John and play with the Records on the same bill, what a sweet person he was.	Matthew Sweet
3	39	1	https://twitter.com/dvntownsend/status/1050069076561645568	0	2	Np: For Esmé - Righteous Woman.	Devin Townsend
711	6497	171	https://twitter.com/JamesWade180/status/1050048823983255553	0	2	Samantha and I are delighted to announce the arrival of Arthur James Wade Born: Monday 8th October 2018 At: 12.39pm Weight:7lb 15oz	James Wade
6	63	2	https://twitter.com/ayeletw/status/1050062661571043328	0	2	Love a feminist. Love a man unthreatened by female success and power. Love a man who will let you care for him as he cares for you. That way, I believe, lies bliss.	Ayelet Waldman
1	20	0	https://twitter.com/ayeletw/status/1050062660304277504	0	2	For 25 years we have been absolutely equal partners in this magical, crazy, delightful, glorious project that is our marriage. To those of you contemplating a partnership with a man I have this to say:	Ayelet Waldman
1	16	0	https://twitter.com/ayeletw/status/1050062657099845632	0	2	I loved him from the moment I met him (literally) for lots of reasons, among them that he took delight in my strength and my ambition. He not only wasn’t scared by female power, he loved it. Being with someone ambitious made him feel stronger, not weaker or imperiled.	Ayelet Waldman
2	12	0	https://twitter.com/ayeletw/status/1050062655820587008	0	2	I chose him because he was as committed to my career as I was, because he stated from the get go that he would stay home with the kids while I worked (at the time I was an attorney and he a writer who worked at night.)	Ayelet Waldman
11	91	7	https://twitter.com/ayeletw/status/1050062654646181888	0	2	Today is the 25th anniversary of my marriage to Michael Chabon, a man I fell in love with for lots of reasons, but primarily because he was a feminist.	Ayelet Waldman
85	4281	158	https://twitter.com/davidwalliams/status/1050139763129364480	0	2	I am pretty sure you both live in Chiswick @antanddecDavid Walliams added,	David Walliams
88	1330	59	https://twitter.com/davidwalliams/status/1050077210365845505	0	2	On set for ‘The Midnight Gang’. @BBCOne Christmas	David Walliams
1	21	5	https://twitter.com/Rubywax/status/1050081082249502720	3	3	Gander at this very expensive trailer for 'No-Brainer' for my Audible Original audiobook. I've hunted down state-of-the-art scientists to answer those niggling questions like: Can we stop ageing? Can we cure mental illness? Can we change our...	Ruby Wax
0	25	4	https://twitter.com/Rubywax/status/1050066428416716800	3	3	Have I got a treat for you... http://rubywax.net/no-brainer.html // @audibleuk	Ruby Wax
3	21	9	https://twitter.com/Rubywax/status/1050030944378179586	3	3	Find #NoBrainer at http://rubywax.net/no-brainer // @audible_com	Ruby Wax
3	50	14	https://twitter.com/Rubywax/status/1049995145389776896	4	3	Let’s hope it’s not just a day let’s keep our finger on the button #WorldMentalHealthDay	Ruby Wax
7	162	39	https://twitter.com/Rubywax/status/1049993546386825216	1	3	30 global ministers before my eyes are finally acknowledging that mental health is the new plague. If you fix the mothership - the brain -you fix the world #globalmhsummit	Ruby Wax
2	61	14	https://twitter.com/Rubywax/status/1049990168994832386	3	3	Ministers from 31 counties making their commitments to mental health #GlobalMHSummit	Ruby Wax
2	38	7	https://twitter.com/Rubywax/status/1049978417918169089	1	3	What are emotions for? Nothing is by accident when it comes to our human development so even negative emotions had some reason to emerge, otherwise they never would have come up in our evolutionary grab bag. Everything we’ve got going for us,... http://rubywax.net/	Ruby Wax
4	102	28	https://twitter.com/Rubywax/status/1049957602040397824	4	1	It’s #WorldMentalHealthDay18 my people are taking it to the world to say “We’re mad as hell and aren’t going to take it anymore” a quote from the film “Network” mental is physical so why the stigma	Ruby Wax
2	59	7	https://twitter.com/Rubywax/status/1049932545381421057	3	3	My new baby - the Audible Original, 'No-Brainer', is out today! It's filled with everything you've ever wanted to know about your brain; how to upgrade it, tame it, and learn to live happily ever after with it. Get it here: http://adbl.co/RubyWax #nobrainer	Ruby Wax
16	365	11	https://twitter.com/trishapaytas/status/1050161445411811328	0	2	new video!!! MY NEW AND IMPROVED LIVING ROOM TOUR (HUGE MAKOVER ON IT) https://www.youtube.com/watch?v=u6ERpSDCbSI … ft the $12,000 couch from restoration hardware! Xo	Trisha Paytas
44	1769	34	https://twitter.com/trishapaytas/status/1050126598521798656	1	3	I get so emotional all the time with how much I love Jason. He just makes me feel so good about myself. It’s so wonderful. I’ve never had a significant other who did that before. It’s like unbelievable	Trisha Paytas
11	850	78	https://twitter.com/trishapaytas/status/1050126310108934144	4	1	I use to think in relationships that was the compromise , like feeling shitty about yourself sometimes. Complete opposite - your partner should always make you feel better about yourself and pump you up with love and support	Trisha Paytas
17	1696	197	https://twitter.com/trishapaytas/status/1050126038485749761	3	3	Moral of these tweets ? Stay single until the right one comes along. If ur significant other makes u feel unloved or unappreciated , get away from that situation	Trisha Paytas
14	1085	88	https://twitter.com/trishapaytas/status/1050125854385135616	4	3	I love being in a relationship. But I use to hate it. It’s all about finding the right one. And I can honestly say I never found anyone close to what I have now. I always felt worthless and insignificant in relationships. It’s so good to just feel happy and equal and appreciated	Trisha Paytas
11	730	28	https://twitter.com/trishapaytas/status/1050125619017605121	1	3	The reason I love having a boyfriend is the endless cuddles. Nothing feels better , I never feel safer or more at peace , then cuddles with J	Trisha Paytas
48	543	8	https://twitter.com/trishapaytas/status/1050077408726925312	0	2	Any fun Instagram worthy things to do in Alhambra ??? Places to eat ? Things to see ?	Trisha Paytas
